1**Title: Continent-wide structure of bacterial microbiomes of European *Drosophila***  
2***melanogaster* suggests host-control**

3

4**Authors**

5Yun Wang<sup>1,2</sup>, Martin Kapun<sup>1,3,4</sup>, Lena Waidele<sup>1,2</sup>, Sven Kuenzel<sup>5</sup>, Alan Bergland<sup>1,6,7</sup>, and

6Fabian Staubach\*<sup>1,2</sup>

8\*to whom correspondence should be addressed: [fabian.staubach@biologie.uni-freiburg.de](mailto:fabian.staubach@biologie.uni-freiburg.de)

9

10**Author affiliations**

11 1 The European *Drosophila* Population Genomics Consortium (DrosEU)

12 2 Department of Biology I, University of Freiburg, Germany

13 3 Department of Biology, University of Fribourg, CH-1700 Fribourg, Switzerland

14 4 University of Lausanne, Department of Ecology and Evolution, Lausanne, Switzerland

15 5 Max Planck Institute for Evolutionary Biology, Ploen, Germany

16 6 Department of Biology, University of Virginia, Charlottesville, VA

17 7 The *Drosophila* Real Time Evolution Consortium (DrosRTEC)

18

19**Competing interests**

20The authors declare no conflict of interest.

21

22**Abstract**

23The relative importance of host-control, environmental effects, and stochasticity in the  
24assemblage of host-associated microbiomes has been much debated. With recent  
25sampling efforts, the underpinnings of *D. melanogaster's* microbiome structure have  
26become tractable on larger spatial scales. We analyzed the microbiome among fly  
27populations that were sampled across Europe by the *European Drosophila Population*

28 *Genomics Consortium* (DrosEU). We combined environmental data on climate and food-  
29 substrate, dense genomic data on host population structure, and microbiome profiling.  
30 Food-substrate, temperature, and host population-structure correlated with microbiome-  
31 structure. The microbes, whose abundance was co-structured with host populations, also  
32 differed in abundance between flies and their substrate in an independent survey,  
33 suggesting host-control. Patterns of enrichment and depletion of microbes between host  
34 and substrate were consistent with a model of host-control, where the host manipulates its  
35 microbiome for its benefit. Putative host-control was bacterial strain specific, supporting  
36 recent evidence for high specificity of *D. melanogaster*-microbe interaction.

37

### 38 **Introduction**

39 Species interactions, such as the interactions between microbes and their hosts are  
40 expected to be frequently driven by competition for resources that results in evolutionary  
41 conflict (Queller and Strassmann, 2018). In particular, horizontally transmitted microbes  
42 can leave an exploited host and move on to the next host, favoring conflict (Ebert, 2013a).  
43 Nonetheless, microbes that benefit higher organisms are prevalent (e.g. Jaenike et al.,  
44 2010; Ankrah and Douglas, 2018; Bang et al., 2018). The frequent benefits that hosts  
45 derive from their microbiome are thought to result from strong selection pressure on the  
46 host to evolve selectivity towards beneficial microbes (Foster and Wenseleers, 2006;  
47 Schluter and Foster, 2012). This selectivity is also termed host-control. However, evidence  
48 for strong host-control over microbiome is limited for many organisms and its importance  
49 compared to environmental factors and stochastic processes in shaping host-associated  
50 microbiomes is debated.

51       Recent data across a variety of hosts, including mammals and insects, suggest that  
52 host-control might not be a major driver of microbiome structure. First, environmental  
53 factors like host-diet often have a dominant effect on microbiome composition (Chandler et

54al., 2011; Wu et al., 2011; Staubach et al., 2013; Wang et al., 2014; Waidele et al., 2017;  
55Rothschild et al., 2018). Second, the discovery of substantial variation of the microbiome  
56between individuals of the same species (Ley et al., 2008; The Human Microbiome Project  
57Consortium et al., 2012; Linnenbrink et al., 2013; Wang and Staubach, 2018) is also  
58difficult to explain under strong host-control. To explain this variation, stochastic,  
59ecologically neutral processes have moved into focus. These processes comprise  
60ecological drift, dispersal, and colonization history (Hubbell, 2001). A dominance of neutral  
61microbiome structuring principles appears plausible for diverse species (Sieber et al.,  
622018), including *Drosophila* (Adair et al., 2018).

63       Without strong host control it is difficult to understand why higher organisms receive  
64benefits from their microbiome so frequently. This is because host-control is supposed to  
65be an important driver of the evolution of microbiome derived benefits in a setting that  
66would otherwise frequently result in conflict between host and microbe (Foster and  
67Wenseleers, 2006; Schluter and Foster, 2012; Ebert, 2013b; Queller and Strassmann,  
682018). A model that resolves this contradiction has recently been proposed by Foster et al.  
69(2017). In their 'ecosystem on a leash' model, the microbiome behaves similar to an  
70ecosystem that is mainly shaped by microbe-microbe interactions. Host-control (the  
71'leash') acts only on a small subset of microbes that affect host fitness. Targeted fostering  
72and exclusion of a relatively small set of microbes in the microbiome might suffice to favor  
73beneficial microbiome function (Schluter and Foster, 2012; Agler et al., 2016; Foster et al.,  
742017).

75       Low but effective levels of host-control as proposed by the 'ecosystem on a leash'-  
76model, also holds promise to help us to better understand the interaction of *Drosophila*  
77with its microbiome. In *D. melanogaster*, the microbiome has well documented effects on  
78somatic growth and reproductive output (Storelli et al., 2011; Shin et al., 2011; Téfit and  
79Leulier, 2017; Sannino et al., 2018; Sommer and Newell, 2018). The effects of the

80microbiome on these traits is caused, at least in part, by an increase in the efficiency of  
81nutrient acquisition by the host in the presence of specific microbial taxa. For instance,  
82reproductive (Pais et al., 2018) and nutritional (Sannino et al., 2018) benefits as well as  
83protection from pathogens (Shin et al., 2011) can be derived from members of the family  
84Acetobacteraceae. This family dominates the natural microbiome (Corby-Harris et al.,  
852007; Cox and Gilmore, 2007; Chandler et al., 2011; Barata et al., 2012; Staubach et al.,  
862013; Adair et al., 2018; Walters et al., 2018). However, the role of host-control in the  
87prevalence of these potentially beneficial bacteria is unclear because the ability of *D.*  
88*melanogaster* to shape its associated microbiome might be limited (Wong et al., 2013;  
89Blum et al., 2013; Broderick et al., 2014). Instead, probabilistic processes contribute to gut  
90colonization (Obadia et al., 2017) and community structure in natural populations can be  
91explained to a large extent by neutral ecological mechanisms (Adair et al., 2018). As in  
92mammals and other organisms, environmental factors, such as the time of collection  
93(Behrman et al., 2018; Adair et al., 2018) or diet (Chandler et al., 2011; Staubach et al.,  
942013; Erkosar et al., 2018; Wang and Staubach, 2018) have a strong effect on the  
95*Drosophila* microbiome. The food-substrate that flies live on can be a more important  
96driver of adaptation for the microbes than the host environment in *D. melanogaster*  
97(Martino et al., 2018).

98 On the other hand, *D. melanogaster* microbiome structure is associated with host  
99genotype (Unckless et al., 2015; Chaston et al., 2016; Behrman et al., 2018), indicating  
100genotype dependent host-control. Microbial communities within flies differ from that in their  
101stool (Fink et al., 2013), suggesting a selection process inside the fly. Further evidence  
102that *D. melanogaster* exerts control over its microbiome comes from a recent study, which  
103found that *D. melanogaster* larvae potentially foster *Lactobacillus plantarum* via excretions  
104(Storelli et al., 2018). Host-control by *D. melanogaster* can be highly specific and fine-  
105tuned. Pais et al. (2018) showed that *Acetobacter thailandicus* can persist in the gut of *D.*

106 *melanogaster*, can be dispersed by the host, and provide a fitness benefit to the host,  
107 while closely related *Acetobacter* strains cannot. In lab-reared flies, dysregulation of  
108 antimicrobial effectors leads to highly specific changes in microbiome composition;  
109 Intriguingly, these changes in community composition can preferentially select for non-  
110 pathogenic taxa over pathogenic ones, despite a close phylogenetic relationship between  
111 these microbial species (Ryu et al., 2008).

112 Host-control of the microbiome that increases host fitness is a key parameter of the  
113 'ecosystem on a leash'- model. The evidence for host-control in *D. melanogaster* suggests  
114 that this model might help us to understand the prevalence of benefits that *D.*  
115 *melanogaster* derives from its microbiome in the face of horizontal transmission, high intra-  
116 specific variation of microbiomes, and strong environmental effects. Given that the model  
117 was originally developed with the mammalian microbiome in mind (Foster et al., 2017), its  
118 applicability to *D. melanogaster* would create a common framework to understand  
119 mammalian and *D. melanogaster* microbiomes. As a consequence, results could become  
120 more transferable between the systems. Obviously, this is highly desirable because *D.*  
121 *melanogaster* is one of the best developed model systems in biology with many  
122 advantages over mammalian models. Together with the relatively simple microbiome  
123 (Erkosar et al., 2013) that is dominated by bacteria (Kapun et al., 2018) it holds promise  
124 for unraveling the driving forces of host-microbiome interactions (Erkosar et al., 2013;  
125 Douglas, 2018).

126 What is currently missing to assess whether the 'ecosystem on a leash' model is  
127 applicable to *D. melanogaster* is more information on the extent of host-control on larger  
128 ecological scales and under natural conditions. These are the conditions where potential  
129 host-control has originated by evolutionary processes. If host-control is important for *D.*  
130 *melanogaster*, imprints of host-control on the microbiome should also become apparent in  
131 a natural setting. Such imprints could be reflected by co-structure of host population

132genetic variation and the microbiome because host-control in *D. melanogaster* varies  
133between natural populations (Behrman et al., 2018; Walters et al., 2018) and depends on  
134host genotype (Unckless et al., 2015; Chaston et al., 2016; Pais et al., 2018). Furthermore,  
135if the natural *D. melanogaster* microbiome is subject to host-control, it should show general  
136properties of host-associated microbiomes, for example elevated levels of 16S gene  
137copies. Finally, microbes that are subject to host-control should differ in abundance  
138between the host and its environment because the effects of host-control outside the host  
139should be smaller or absent.

140 In order to test these basic predictions and further assess the role of host-control in  
141natural *D. melanogaster* populations, we profiled the bacterial microbiome, in 50 samples  
142across Europe, using 16S rRNA gene sequencing (Figure 1 and Table S1). The sampling  
143range covered different climates and allowed us to address the effect of environmental  
144factors on the microbiome. We combined the 16S profiles with population level allele  
145frequency data for more than 20,000 neutral SNPs to test for co-structure of the  
146microbiome with host genetic variation. For further exploration of potential host-control, we  
147tested whether microbiomes showed typical properties of host-associated communities,  
148specifically in terms of increased 16S gene copy number. Finally, we identified bacterial  
149taxa that correlated with host population structure. These taxa were analyzed in an  
150independent survey, comparing fly-associated microbiomes to that of their substrate, to  
151test whether these taxa show different abundance that indicates of host-control.

152

## 153Results

154We analyzed a total of 5,217,762 16S rRNA reads after quality filtering (Table S2).  
1552,672,402 *Wolbachia* sequences were removed. In order to make the diversity  
156assessment comparable between samples, we rarefied (subsampling) the number of  
157sequences per sample to 5,135 per sample for the continental range analysis and to 898

158 sequences per sample for the fly versus substrate survey. We grouped the sequences into  
159 100% identity Operational Taxonomic Units (OTUs) for high resolution analysis, unless  
160 otherwise noted. We chose 100% identity to resolve strain level differences because the  
161 interaction with the fly host may differ for closely related bacteria (Ryu et al., 2008; Pais et  
162 al., 2018). Please note that the sequences were rigorously quality filtered and sequencing  
163 errors were removed (see Materials and Methods).

164

#### 165 Community composition and diversity

166 The *Drosophila* microbiome across Europe was dominated by acetic acid bacteria  
167 (Acetobacteraceae 63.6%, Figure S1). The three most common genera were *Acetobacter*  
168 (26.1%), *Gluconobacter* (17.4%), and *Commensalibacter* (15.4%). Enterobacteriaceae  
169 were also common (15.2%). Shannon diversity was 2.61 +/- 0.65 (SD) at the 100%  
170 identity OTU level and 1.99 +/- 0.53 (SD) at the 97% identity OTU level. Composition and  
171 diversity of the *D. melanogaster* microbiome were similar to those reported previously from  
172 natural *D. melanogaster* isolates. For a comparison of alpha diversity between studies see  
173 Staubach et al. (2013).

174

#### 175 The natural *D. melanogaster* bacterial microbiome is structured on a continental scale

176 As a first step to better understand the structuring principles of the *D. melanogaster*  
177 microbiome, we tested whether the natural *Drosophila* associated microbiome is structured  
178 on a continental scale. The absence of continental structure would be consistent with a  
179 stochastic distribution of microbes and speak against both, host-control, as well as  
180 selection of microbial taxa by other environmental factors.

181 Bray-Curtis-Dissimilarities (BCD) of the bacterial communities increased rapidly with  
182 geographic distance ( $r = 0.196$ ,  $P = 0.0015$ , Mantel-Test, Figure 2), indicating geographic

183structure of microbial communities associated with *D. melanogaster* on a continent-wide  
184scale.

185

186Host genetic differentiation and temperature correlate with microbiome structure

187In order to identify the factors underpinning continental structure, we modeled microbiome  
188composition in a Redundancy Analysis (RDA) framework. We selected temperature,  
189precipitation, and substrate as candidate environmental variables that could affect  
190microbiome structure. We chose temperature because it can affect microbial communities  
191on geographic scales (Thompson et al., 2017). Substrate is a major determinant of natural  
192*Drosophila* microbiomes (Chandler et al., 2011; Staubach et al., 2013; Wang and  
193Staubach, 2018). A lack of precipitation might affect microbiome assembly by selecting for  
194xerotolerant microbes. Because microbial communities might reflect long-term or short-  
195term trends in temperature and precipitation, we included annual, as well as monthly  
196means of temperature and precipitation in our model. The inclusion of monthly  
197temperature and precipitation at the time of collection allows us to assess seasonal  
198variation in these parameters that could affect microbiomes. Finally, we reasoned that  
199*Drosophila* host population structure might explain interpopulation differences in microbial  
200community composition. This would be expected if potential host-control of the microbiome  
201varied between host populations or if microbes and fly host show patterns of co-dispersal  
202and parallel demographic histories on a continent-wide scale.

203 The full model (including all factors described above) explained approximately half  
204(46.3%) of the variance in the bacterial microbiome, indicating that the model contained  
205factors that affect the bacterial microbiome. In order to select the most relevant  
206explanatory variables from the full model, we employed a forward model selection  
207approach. This resulted in host genetic differentiation (PC1 and PC2), mean annual  
208temperature (T(y)), and substrate as relevant factors for *Drosophila* microbiome



209composition at the 100% OTU level (Table 1). We further reasoned that the microbiome  
210might be structured at a higher taxonomic level. In particular, Acetobacteraceae comprise  
211many bacteria that are dispersed by *D. melanogaster* and convey benefits to their hosts  
212(Shin et al., 2011; Barata et al., 2012; Pais et al., 2018). Conversely, many  
213Enterobacteriaceae are *Drosophila* pathogens. Susceptibility and virulence of these  
214bacteria varies between natural host populations (Behrman et al., 2018). By applying the  
215same model selection approach at the bacterial family level, we also identified host genetic  
216differentiation (PC1) and annual mean temperature (T(y)) as relevant factors for  
217microbiome composition (Table 2).

218

219The abundance of OTU2 (*Commensalibacter*), and Enterobacteraceae co-vary with host  
220population structure

221We were interested to identify bacteria underlying the correlation of microbiome  
222composition with host population structure. These bacteria might respond to potential  
223differences in host-control between natural host populations. Therefore, we tested whether  
224the relative abundance of OTUs correlated with host genetic variation. At the 100% identity  
225OTU level, only the abundance of OTU2 (*Commensalibacter*, Acetobacteraceae)  
226correlated with PC1 of host genetic variation (Figure 3,  $P = 0.00017$ ,  $q = 0.0065$ ,  $r = -0.52$ ,  
227Pearson's Product-Moment correlation). This suggested strain level specificity of host  
228effects on the microbiome. At the family level, Enterobacteraceae ( $P = 0.037$ ,  $q = 0.17$ ,  $r =$   
2290.30, Pearson's correlation), Leuconostocaceae ( $P = 0.047$ ,  $q = 0.17$ ,  $r = 0.29$ , Pearson's  
230correlation), and Acetobacteraceae ( $P = 0.039$ ,  $q = 0.17$ ,  $r = -0.30$ , Pearson's correlation)  
231were structured according to PC1. However, when removing all sequences from OTU2,  
232Acetobacteraceae were not significantly correlated with host population structure anymore  
233( $P = 0.16$ ,  $q = 0.38$ ), suggesting that OTU2 contributed significantly to the correlation. A  
234representative sequence of OTU2 perfectly matched *Commensalibacter intestini* strain

235A911 (Roh et al., 2008), a previously described commensal of *D. melanogaster*. No  
236individual OTU correlated with PC2 of host genetic variation.

237

238No evidence for pronounced dispersal limitation of bacteria that correlate with host  
239population structure

240We hypothesized above that the microbiome could be affected by host-control that varies  
241between host populations. Alternatively, a correlation of microbiomes with host population  
242structure could result from bacteria that are dispersal limited and depend on the fly host for  
243dispersal. If the bacteria were severely dispersal limited on a global scale, we would  
244expect the occupied geographic range of the bacteria in question to be rather limited.  
245However, this is not the case; the bacterial groups that are structured according to host  
246population structure in Europe (OTU2, Enterobacteraceae, Acetobacteraceae,  
247Leuconostocaceae) can also be found along the East Coast and on the West Coast of the  
248USA (Figure 4). Furthermore, these bacterial groups, were also previously found in  
249association with wild-caught *D. takahashii* from Hawaii, *D. seychellia* collected from  
250morinda fruit on the Seychelles, cactus feeding *D. mojavensis* and even in mushroom  
251feeding *Microdrosophila* (Chandler et al., 2011). A representative sequence of OTU2  
252matched sequences from these diverse locations and species perfectly (Chandler et al.,  
2532011). This suggested that there is no pronounced dispersal limitation on a global scale for  
254these bacteria and that the bacteria in question are rather cosmopolitan. Hence, a  
255scenario, in which the bacteria are severely dispersal limited and depend on *D.*  
256*melanogaster* dispersal on the continental scale, appears implausible.

257

25816S copy number of the natural *Drosophila* bacterial microbiome is typical for host-  
259associated communities

260 Because the bacteria that are co-structured with their host populations on the continental  
261 scale are cosmopolitan, dispersal effects seemed insufficient to explain the co-structure of  
262 microbiomes and host population genetic variation. Therefore, we reasoned that host-  
263 control might contribute to the co-structure. If the *Drosophila* microbiomes that we analyzed  
264 were subject to host-control, they should differ from environmental microbiomes. Analyzing  
265 16S rRNA gene copy numbers can help to distinguish between environmental and host-  
266 associated microbiomes: host-associated microbiomes have increased 16S rRNA gene  
267 copy numbers (Thompson et al., 2017) when compared to environmental microbiomes.  
268 The 16S gene copy number of our samples was in the typical range of host-associated  
269 communities, and significantly higher than that of non-host associated communities ( $P <$   
270  $2.2e-16$ , Mann–Whitney U test, Figure 5). In an independent survey, where we compared  
271 the microbiomes of flies and their immediate substrate, we also found more copies of the  
272 16S rRNA gene in the flies than in the substrate ( $P < 0.01$ , Mann–Whitney U test, one-  
273 sided, Figure 5). This distinguishes the *D. melanogaster* microbiome from purely  
274 environmental microbiomes and supports host-related structuring.

275

#### 276 Host-specificity of microbes that are co-structured with host population genetic variation

277 16S gene copy numbers suggested that the natural *D. melanogaster* microbiome is a  
278 typical host-associated community. This encouraged us to further explore the possibility  
279 that interactions with the host underlie the co-structure of microbiomes with host genetic  
280 variation. In order to test this, we analyzed whether the bacteria that were co-structured  
281 with host genetic variation differed in abundance between flies and their substrate.  
282 Specifically, we hypothesized that potential host-control would lead to a depletion of  
283 Enterobacteraceae in the flies because flies might avoid or reduce contact with these  
284 bacteria for their frequent pathogenicity. For example, Enterobacteraceae of the genera  
285 *Providencia*, *Serratia*, *Erwinia*, *Pseudomonas* are *Drosophila* pathogens. Indeed,

286Enterobacteraceae were more abundant in the substrate than in the flies ( $P = 0.026$ ,  
287paired Mann-Whitney test, one sided, Figure 6A). Furthermore, we expected to find OTU2  
288(*C. intestini*) at higher abundance in the fly than in the substrate because this OTU is a  
289common member of the *D. melanogaster* associated community and contributes to healthy  
290gut homeostasis (Ryu et al., 2008; Chandler et al., 2011). Indeed, OTU2 was enriched in  
291flies (Figure 6B,  $P = 0.022$ , paired Mann-Whitney test, one-sided). Finally, we expected  
292that Acetobacteraceae in general would be enriched in flies over substrate because this  
293family contains several members that benefit *D. melanogaster* (Shin et al., 2011; Pais et  
294al., 2018). This expectation was also confirmed (Figure 6C,  $P = 0.034$ , paired Mann-  
295Whitney test, one-sided). However, when OTU2 was excluded from the analysis of  
296Acetobacteraceae, Acetobacteraceae were not significantly enriched in flies anymore ( $P =$   
2970.21 paired Mann-Whitney test, one sided), indicating that OTU2 contributed to family level  
298differences. We found no difference between flies and substrate for Leuconostocaceae ( $P$   
299= 0.27, paired Mann-Whitney test, two-sided).

300

## 301Discussion

302We set out to test whether there is evidence for host-control over the microbiome by *D.*  
303*melanogaster* in a natural setting. For this purpose, we combined a comprehensive  
304analysis of the structuring principles of the *D. melanogaster* microbiome on a continent-  
305wide scale (Figure 1 and Table S1) with an independent survey comparing the microbiome  
306of flies to that of their substrate. This resulted in several lines of evidence that support the  
307idea that *D. melanogaster* exerts limited, but detectable and highly specific control over its  
308microbiome.

309

## 310Co-structure between host genetic variation and the microbiome

311The correlation of host population genetic differentiation and the differentiation of  
312microbiomes can be interpreted as evidence for host-control. This correlation is consistent  
313with a model, in which stronger genetic differentiation leads, on average, to larger  
314differences in host-control, and hence host-associated microbiomes. Given ample  
315evidence for variation in host-control between natural populations that depends on  
316genotype (Lazzaro et al., 2008; Corby-Harris and Promislow, 2008; Behrman et al., 2018;  
317Walters et al., 2018) this seems a reasonable model.

318 It appears unlikely that co-structure resulted from environmental factors that affect  
319both, the microbiome and host genetic variation for two reasons: First, we accounted for  
320the most plausible environmental factors that could affect microbiomes and the host at the  
321same time in our model (food-substrate, temperature, precipitation). Second, for assessing  
322host genetic variation, we used SNPs from small introns that are considered least affected  
323by natural selection (Parsch et al., 2010; Lawrie et al., 2013). Therefore, it is unlikely that  
324selection exerted by environmental factors that also affect the microbiome strongly affects  
325these SNPs and generates co-structure.

326 It is similarly difficult to explain the co-structure by co-dispersal of *Drosophila* and  
327bacteria because we found no evidence for pronounced dispersal limitation of the bacteria  
328that co-vary with host genetic differentiation on a global scale (Figure 4). Instead, our data  
329and previous studies suggest that these bacteria are cosmopolitan (Cox and Gilmore,  
3302007; Chandler et al., 2011). Taken together that environmental variation was accounted  
331for and that we found no evidence for dispersal limitation, a role for host-control in the  
332observed co-structure appears plausible.

333  
33416S copy numbers and differences between flies and substrate microbiomes support host-  
335control

336 Host effects on the microbiome were further supported by 16S rRNA gene copy numbers  
337 that were in the typical range for host-associated communities and significantly different  
338 from that of non-host associated communities (Figure 5). As expected, the copy number in  
339 the substrate samples was smaller than that in fly samples. Interestingly, the copy number  
340 in substrate microbiomes was still larger than that of typical non-host associated  
341 microbiomes. This is consistent with *Drosophila* also affecting the microbiome of its  
342 immediate environment (Wong et al., 2015; Chaston et al., 2016; Storelli et al., 2018) and  
343 transforming it to appear more host-like.

344 Besides the increased number of 16S gene copies, host-control was evident from  
345 differences between the host microbiome and that of its substrate; three of the four  
346 bacterial groups (Acetobacteraceae, Enterobacteraceae, OTU2) that correlated with host  
347 genetic variation on a continental scale (Figure 3) also differed in abundance between flies  
348 and their substrate (Figure 6).

349

#### 350 Fitness effects of microbes that show evidence of host structuring support host-control

351 The evidence above supports host-related structuring of the microbiome that is consistent  
352 with host-control. However, the term 'host-control' also implies that the effects of the host  
353 on the microbiome provide some fitness benefit to the host. The bacteria that are  
354 structured in the host environment and the direction of the structuring (enrichment or  
355 depletion) suggest such fitness benefits.

356 It seems reasonable to assume that the reduction of Enterobacteriaceae in the fly  
357 environment (Figure 6), is likely beneficial for the flies, because this family comprises a  
358 range of the most important *D. melanogaster* pathogens. Examples are *Providencia*  
359 (Galac and Lazzaro, 2011), *Serratia* (Flyg et al., 1980; Lazzaro et al., 2006), *Erwinia*  
360 (Basset et al., 2000), and *Pseudomonas* (Vodovar et al., 2005). A reduction of  
361 Enterobacteriaceae in the fly gut is in line with results from Ryu et al. (2008). These

362 authors have shown that Enterobacteriaceae, including the highly pathogenic *Erwinia*  
363 *carotovora carotovora-15* do not persist in the fly gut.

364 In contrast to Enterobacteriaceae, Acetobacteraceae were enriched in the host.  
365 This pattern was mainly driven by OTU2 (*C. intestini*). This OTU matches sequences from  
366 previous studies on fruit flies in the natural environment (Blast results Table S3) (Cox and  
367 Gilmore, 2007; Chandler et al., 2011; Wang and Staubach, 2018) and in the laboratory  
368 (Ryu et al., 2008). In particular, it perfectly matches *C. intestini strain A911* (Roh et al.,  
369 2008). This strain is sensitive to anti-microbial peptides (AMPs) (Ryu et al., 2008), and  
370 hence can be subject to host-control. In wild-type flies, it is a dominant member of the  
371 microbiome. When AMPs are misregulated it is replaced by *Gluconobacter morbifer* that  
372 has detrimental effects on flies. Thus, in the wild-type gut environment, *C. intestini strain*  
373 *A911* is favored by the host and has a protective function. Favoring of a protective microbe  
374 can be considered host-control.

375

#### 376 The specificity of host-control

377 *G. morbifer* as well as *C. intestini* are Acetobacteraceae, and hence relatively closely  
378 related. That flies can favor one over the other, points towards highly specific host-control  
379 in *D. melanogaster*. Our results suggest that host-control can also be highly specific under  
380 natural conditions; Only OTU2 (perfect sequence match with *C. intestini*) was strongly co-  
381 structured with host genetic variation and at the same time enriched in flies over substrate  
382 (Figure 3 and 6). The evidence for high specificity in the interaction with bacteria that we  
383 found parallels recent results from Pais et al. (2018). These authors found that  
384 *Acetobacter thailandicus* colonizes *D. melanogaster* and persists in the gut, while a closely  
385 related *Acetobacter* strain does not persist. High specificity also fits in with results from  
386 Adair et al. (2018), who showed that the assembly of the natural bacterial microbiome in  
387 the *D. melanogaster* gut can be largely explained by neutral processes, except for a

388specific set of bacteria. This specificity of the interaction of *D. melanogaster* with its  
389microbiome is also fully compatible with recent advances in understanding the mechanistic  
390principles of *D. melanogaster* immunity. A combination of highly specific regulation of the  
391IMD pathway via different peptidoglycan recognition proteins (PGRPs) and specific  
392regulation of the duox pathway (Ha et al., 2005; Lhocine et al., 2008; Bosco-Drayon et al.,  
3932012; Lee et al., 2013; Guo et al., 2014; Iatsenko et al., 2016; Neyen et al., 2016) can lead  
394to highly specific selection processes acting on bacterial communities in the fly gut.

395 While we found support for specific interaction with OTU2 (*C. intestini*), more  
396general mechanisms seemed to be at work for the interaction with Enterobacteriaceae.  
397The reduction of Enterobacteraceae in the fly, when compared to the substrate was not  
398linked to any specific OTUs from this family. Likewise, the co-structure with host genetic  
399variation, was only apparent for the family as a whole. This family level host-control could  
400arise in response to signals that are common to Enterobacteriaceae or from their potential  
401pathogenicity in the sense of a danger or damage signal (Matzinger, 2002). Alternatively,  
402the *Drosophila* gut might be just less favorable in terms of its physical condition (e.g. pH)  
403or presence of antimicrobial agents (e.g. AMPs).

404

#### 405Environmental factors and the *D. melanogaster* microbiome

406In addition to host genetic structure, temperature as well as the substrate, the flies were  
407collected from, correlated with microbiome structure. While the effects of substrate on the  
408fly microbiome are well described (Chandler et al., 2011; Staubach et al., 2013; Wang and  
409Staubach, 2018), a continental scale temperature effects on a host-associated microbiome  
410has, to our knowledge, not been described before. Temperature affects environmental  
411microbiomes on a global scale (Zhou et al., 2016; Thompson et al., 2017) and the effect in  
412*Drosophila* might reflect the exposure of flies to different environmental microbiomes.  
413Temperature dependence of the microbiome could also be the result of a temperature



414dependent dietary switch (Brankatschk et al., 2018); small scale structure of the food  
415sources might allow flies to acquire selectively more plant or yeast material, which might  
416lead to changes in microbiome composition.

417 While there was a significant effect of annual temperature on the microbiome, the  
418correlation with monthly temperature at the collection date only showed a trend ( $P =$   
4190.065). Because our seasonal sampling was relatively limited (nine locations), more data is  
420required to address the question whether seasonal temperature changes affect the  
421microbiome. Seasonal variation in *D. melanogaster* associated microbiomes has been  
422described by Behrman et al. (2018) and correlates with differences in pathogen  
423susceptibility of the host. This points towards the possibility that seasonal changes in the  
424microbiome could add to seasonal selective regimes and contribute to seasonal genome  
425variation in *D. melanogaster* (Bergland et al., 2014; Machado et al., 2018).

426 The effects of temperature on the microbiome seemed more general as no specific  
427OTU nor family was significantly correlated with temperature variation.

428

## 429**Conclusion**

430*D. melanogaster* lives in a microbe rich environment; rotting fruit. In this environment, it is  
431essential for flies to foster beneficial microbes and avoid pathogens. Using continental  
432scale data from natural populations, we presented evidence for specific host-control that  
433favors a protective bacterium. This adds to the recent notion of high specificity of host-  
434microbe interaction in *D. melanogaster* and shows that this specificity unfolds in an  
435ecological and evolutionary context. At the same time, our study supports previous findings  
436of strong environmental effects on the natural *D. melanogaster* microbiome. Strong  
437environmental effects in combination with host-control of a relatively small subset of the  
438partners is concordant with the 'ecosystem on a leash' model. Our results support the idea  
439that this model might serve as a common framework to understand *D. melanogaster* and

440mammalian microbiomes. A common framework for mammalian and *D. melanogaster*,  
441increases the transferability and generalizability between systems. Hence, we see a bright  
442future for the *D. melanogaster* microbiome as a model for other organisms, including  
443mammals, in host-microbiome research.

444

## 445**Materials and Methods**

### 446Fly and substrate samples

447European fly samples were collected as described in Kapun et al. (2018). In short, 50  
448samples of *D. melanogaster* were collected from 31 locations across the European  
449continent with a joint effort of European research groups (Figure 1 and Table S1). Each  
450sample contained a pool of 33-40 wild-caught males. We used males only because only  
451males can be reliably distinguished from sympatric *D. simulans*. The effects of pooling on  
452*D. melanogaster* microbiome profiling were assessed in detail by Wang and Staubach  
453(2018). In short, pooling provides a more comprehensive picture of the population  
454microbiome than an individual fly. While differences in microbiome structure between  
455individuals tend to even out in a pool, differences between populations be well  
456differentiated. Because we were interested in variation between populations here, a  
457pooling approach is well suited. All 50 samples were included for analyzing *Drosophila*-  
458associated bacterial community composition, diversity and dispersal patterns. Because  
459data on host genetic differentiation for samples FR\_Vil\_14\_06, UA\_Yal\_14\_17, and  
460DK\_Kar\_14\_40 was not available, these samples were excluded from the analysis of  
461continental scale community structure. The visualization of fly samples on the map in  
462Figure 1 was generated with the R package 'ggmap' (Kahle and Wickham, 2013).

463 Twelve samples from the East Coast of the USA were collected in the same fashion  
464as the European samples and represent population pools of males. Seven of these  
465samples were already analyzed in Behrman et al. (2018) (see Table S1 for details). The

466 samples named NY and WI were described in Machado et al. (2018). However, the 16S  
467 data for these samples was generated here. Because we did not have detailed information  
468 on the substrate, these samples were collected from, we did not include them in our  
469 continental scale modeling. We used these samples for evaluating the global range of  
470 bacteria (Figure 4). For the same purpose, we included 13 fly samples from Wang and  
471 Staubach (2018) that were primarily collected at the West Coast of the USA (see Table S1  
472 for details).

473 For the survey of the microbiome of flies and their substrate, pairs of pools of five  
474 flies and the corresponding substrate for a total of 24 samples were collected. The  
475 immediate substrate, on which the flies that we collected were sitting and feeding was  
476 collected with a sterile scalpel and transferred to a sterile microcentrifuge tube. The survey  
477 spanned 6 different substrates from 4 locations (Table S1).

478

#### 479 DNA extraction, PCR and sequencing

480 DNA from the DrosEU samples was extracted by standard phenol-chloroform extraction  
481 after homogenization with 3 minutes of bead beating on QIAGEN TissueLyser II as  
482 described in Kapun et al. (2018). DNA from population pools from the USA were extracted  
483 as described in Bergland et al. (2014). DNA extraction for pools of five flies and the  
484 corresponding substrate was performed using the Qiagen QIAamp DNA extraction kit  
485 (Qiagen, Carlsbad, CA) combined with bead beating in the same way as for fly samples  
486 from Wang and Staubach (2018).

487 Barcoded bacterial broad range primers, 515F (5'GTGCCAGCMGCCGCGGTAA3')  
488 and 806R (5'GGACTACHVGGGTWTCTAAT3') from Caporaso et al. (2011) were used to  
489 amplify the V4 region of the bacterial 16S rRNA gene. DNA was amplified with Phusion®  
490 Hot Start DNA Polymerase (Finnzymes, Espoo, Finland) under the following conditions: 30  
491 sec at 98°C; 30 cycles of 9 sec at 98°C, 60 sec at 50°C and 90 sec at 72°C; final

492 extension for 10 min at 72°C. In order to reduce PCR bias, amplification reactions were  
493 performed in duplicate and pooled. PCR products quantified on an agarose gel and pooled  
494 in equimolar amounts. Extraction control PCRs were negative and excluded. The resulting  
495 pool was gel extracted using the Qiaquick gel extraction kit (Qiagen, Carlsbad, CA) and  
496 sequenced on an illumina MiSeq sequencer reading 2 × 250bp.

497

#### 498 Data analysis

499 We analyzed sequencing data using MOTHUR v1.40.0 (Schloss et al., 2009). Main  
500 processing steps in MOTHUR included alignment of paired reads, quality filtering, removal  
501 of PCR errors, removal of chimeric sequences, subsampling (rarefaction), and alpha-  
502 diversity calculations (Kozich et al., 2013). Sequences were taxonomically classified using  
503 the SILVA reference database 'Release 132' (Pruesse et al., 2007) as implemented in  
504 MOTHUR. A detailed step by step analysis script with all commands executed can be  
505 found in the supplementary File Script1 for full reproducibility. For studying geographical  
506 microbiome structure, OTUs were clustered at 100% identity. Only for the comparison of  
507 Shannon diversity to previous studies, we also included clustering at 97% sequence  
508 identity.

509 To identify factors that shape microbial communities, we applied Redundancy  
510 Analysis (RDA). Following Borcard, Gillet and Legendre (2018), OTU count data was  
511 Hellinger transformed to allow analysis in the linear RDA framework. In order to reduce the  
512 effects of rare species on RDA and assuming that ecologically relevant species should be  
513 frequent, we focused the analysis on OTUs with more than 1000 reads across samples.  
514 Our candidate explanatory variables were temperature, precipitation, substrate and host  
515 genetic differentiation. Data of annual and monthly mean temperature (BIO 1 and tmean)  
516 and precipitation (BIO 12 and prec) were downloaded from WorldClim (Fick and Hijmans,  
517 2017, see supplementary File Script2). Host genetic differentiation was represented by the

518 first two principle components of an allele frequency based Principle Components Analysis  
519 performed by Kapun et al. (2018). In short the data represents allele frequencies from  
520 more than 20,000 SNPs in short intronic sequences that evolve putatively neutral and best  
521 represent population structure. In order to select the variables that were most important for  
522 microbiome structure, we applied forward model selection of additive linear models. This  
523 was done with the `ordistep` function from the `vegan` R package (Oksanen et al., 2018). The  
524 `Ordistep` function provides a stepwise approach to select variables based on permutation  
525 P-values and Akaike's Information Criterion (AIC).

526 In order to test for potential spatial autocorrelation we followed the protocol by  
527 (Borcard et al., 2018) using the `dbmem` function. This protocol employs eigenvector  
528 analysis to detect autocorrelation at different scales. We found no evidence for significant  
529 autocorrelation in our data (see supplementary File Script3) after removal of the continent-  
530 wide trend in species distributions that we analyzed here. All algorithms were part of the  
531 `vegan` (Oksanen et al., 2018) and `adespatial` R packages (Dray et al., 2018). Geographic  
532 distances were computed with the `gdist` function from the `lmap` R package (Wallace, 2012,  
533 see supplementary File Script4).

534 For the correlation of host genetic differentiation with the relative abundance of  
535 individual OTUs and bacterial families, we calculated q-values with the `p.adjust` function in  
536 R to account for multiple testing. Following the recommendation by Efron et al. (2007),  
537 only significant correlations ( $P < 0.05$ ) with bacterial groups with q-values smaller than 0.2  
538 were considered significant.

539 Average community 16S rRNA gene copy number (ACN) was predicted from 16S  
540 rRNA gene amplicon data using PICRUSt (Langille et al., 2013). The method for  
541 calculating ACN was adapted from Thompson et al. (2017). We first classified sequences  
542 using the Greengenes reference database and generated an OTU table in the Biom-format  
543 using the `make.biom` function in MOTHUR. The resulting biom-formatted table served as

544input for the `normalize_by_copy_number.py` command implemented in PICRUSt. The  
545output file is a normalized observation table. ACN for each sample were calculated as the  
546raw sample sum divided by the normalized sample sum.

547

#### 548**Data availability**

549Raw sequence data is in the submission process to the ncbi short read archive (SRA).

550

#### 551**Acknowledgements**

552We thank the DrosEU consortium for the coordinated sampling and fruitful collaboration.

553We thank the Paul Schmidt (University of Pennsylvania), John Pool (University of

554Wisconsin), Lazzaro (Cornell University) labs, as well as the Drosophila Real Time

555Evolution Consortium (DrosRTEC) for samples. We thank Carsten Dormann (University of

556Freiburg) for statistical support. The authors acknowledge support by the state of Baden-

557Württemberg through bwHPC. This work was funded by a DFG grant to FS (STA1154/4-1,

558408908608) and the Landesgraduiertenfoerderung of the state of Baden-Württemberg.

559

560

561

562

563

564

565

566

567

568

569

570**Table 1** RDA model selection for factors that explain community composition at the 100%  
 571identity OTU level. The forward selection approach starts with the null model, adding the  
 572best explanatory factors one by one until adding the next factor fails to significantly  
 573improve the model. Significant p-values and the best model are in bold. P-values are  
 574based on permutation tests. PC1 = Axis 1 of host genetic variation, PC2 = Axis 1 of host  
 575genetic variation, substrate = substrate the flies were collected from, T(y) = mean annual  
 576temperature, T(m) = mean monthly temperature.

577

| <b>model</b> | <b>factors</b>                | <b>add</b>   | <b>AIC</b>      | <b>P</b>     |
|--------------|-------------------------------|--------------|-----------------|--------------|
| M0           | NULL                          |              | - 20.757        |              |
| M1           | PC1                           | +PC1         | - 21.802        | <b>0.001</b> |
| M2           | PC1+substrate                 | +bait        | - 18.470        | <b>0.007</b> |
| M3           | PC1+substrate+PC2             | +PC2         | - 19.076        | <b>0.013</b> |
| <b>M4</b>    | <b>PC1+substrate+PC2+T(y)</b> | <b>+T(y)</b> | <b>- 19.905</b> | <b>0.011</b> |
| M5           | PC1+substrate+PC2+T(y)+T(m)   | +T(m)        | - 20.130        | 0.065        |

579

580**Table 2** RDA model selection for factors that explain community composition at the family  
 581level. The forward selection approach starts with the null model, adding the best  
 582explanatory factors one by one until adding the next factor fails to significantly improve the  
 583explanatory power of the model. Significant p-values and the best model are in bold. P-  
 584values are based on permutation tests. PC1 = Axis 1 of host genetic variation, PC2 = Axis  
 5851 of host genetic variation, substrate = substrate the flies were collected from, T(y) = mean  
 586annual temperature.

| <b>model</b> | <b>factors</b>  | <b>add</b>  | <b>AIC</b>      | <b>P</b>     |
|--------------|-----------------|-------------|-----------------|--------------|
| M0           | NULL            |             | - 73.782        |              |
| M1           | T(y)            | +T(y)       | - 76.095        | 0.002        |
| <b>M2</b>    | <b>T(y)+PC1</b> | <b>+PC1</b> | <b>- 77.237</b> | <b>0.012</b> |
| M3           | T(y)+PC1+PC2    | +PC2        | - 77.488        | 0.067        |

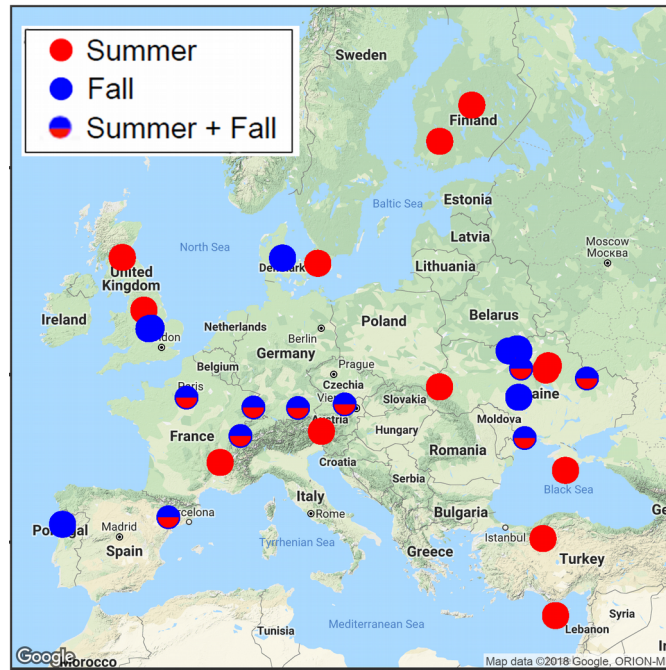

589 **Figure 1** Overview of sampling locations. The map shows the geographic locations of 50  
590 samples for bacterial community analysis in the 2014 DrosEU dataset. The color of the  
591 circles indicates the sampling season for each location.

592

593



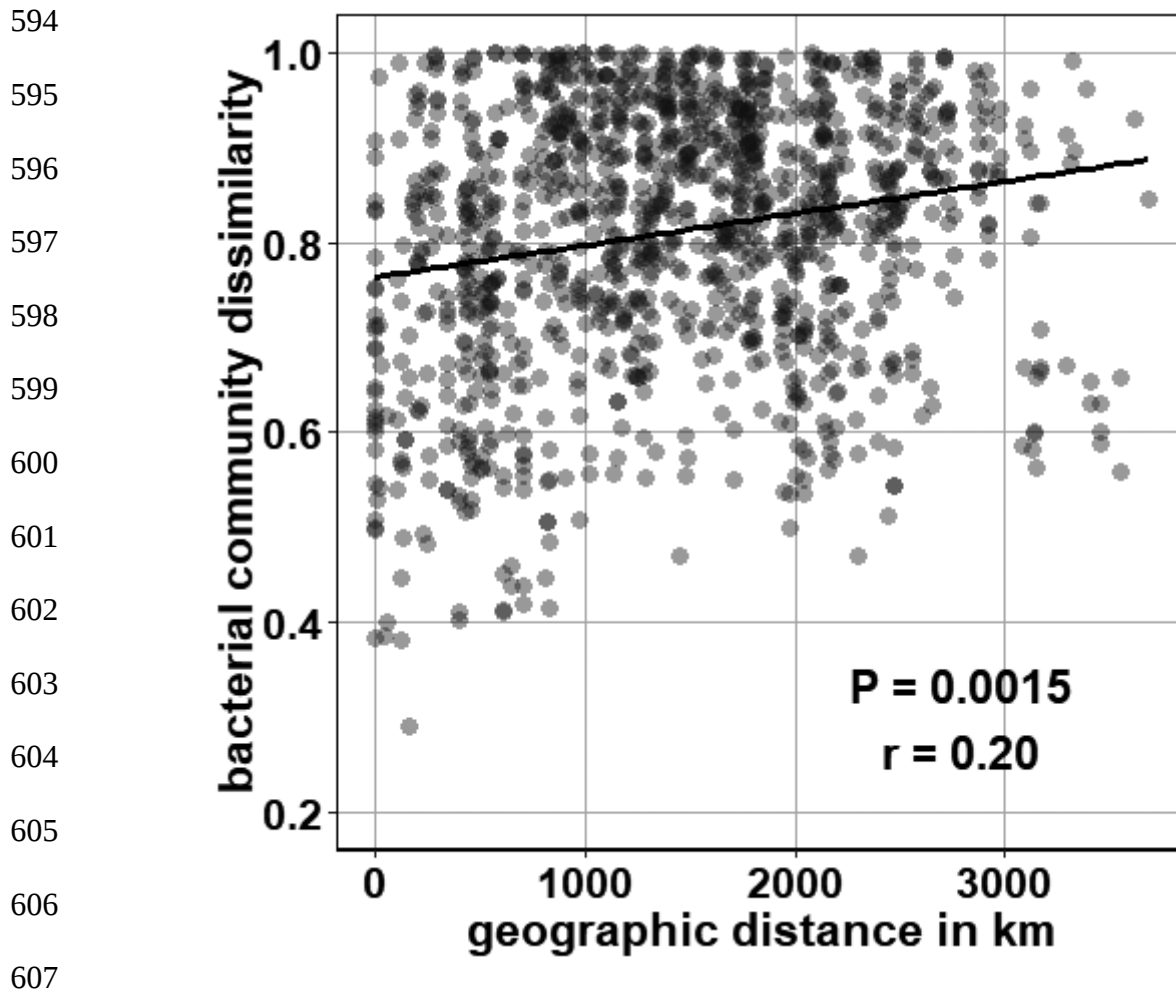

608 **Figure 2** Correlation between pairwise geographic distance and BCD of the bacterial  
609 communities. P-value according to Mantel test; r is Pearson's correlation coefficient.

610

611

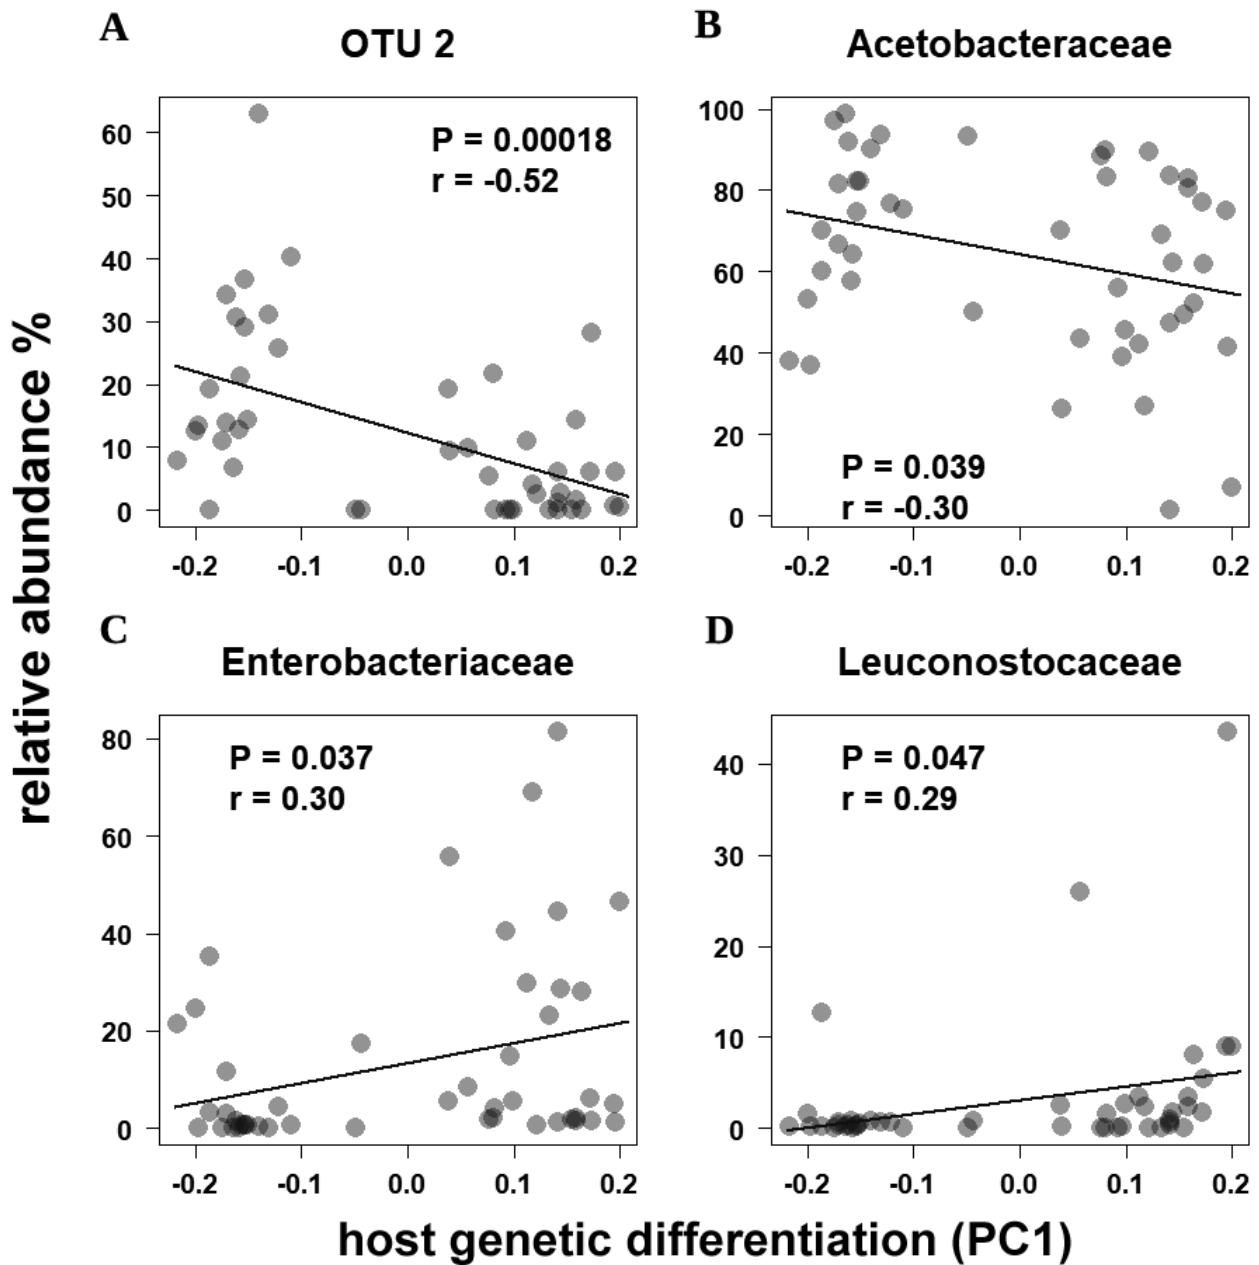

612 **Figure 3** OTU2 (A) and three bacterial families (B-D) correlate with host genetic  
613 differentiation (PC1). P-value and correlation coefficient according to Pearson's Product-  
614 Moment Correlation.

615

616

617

618

619

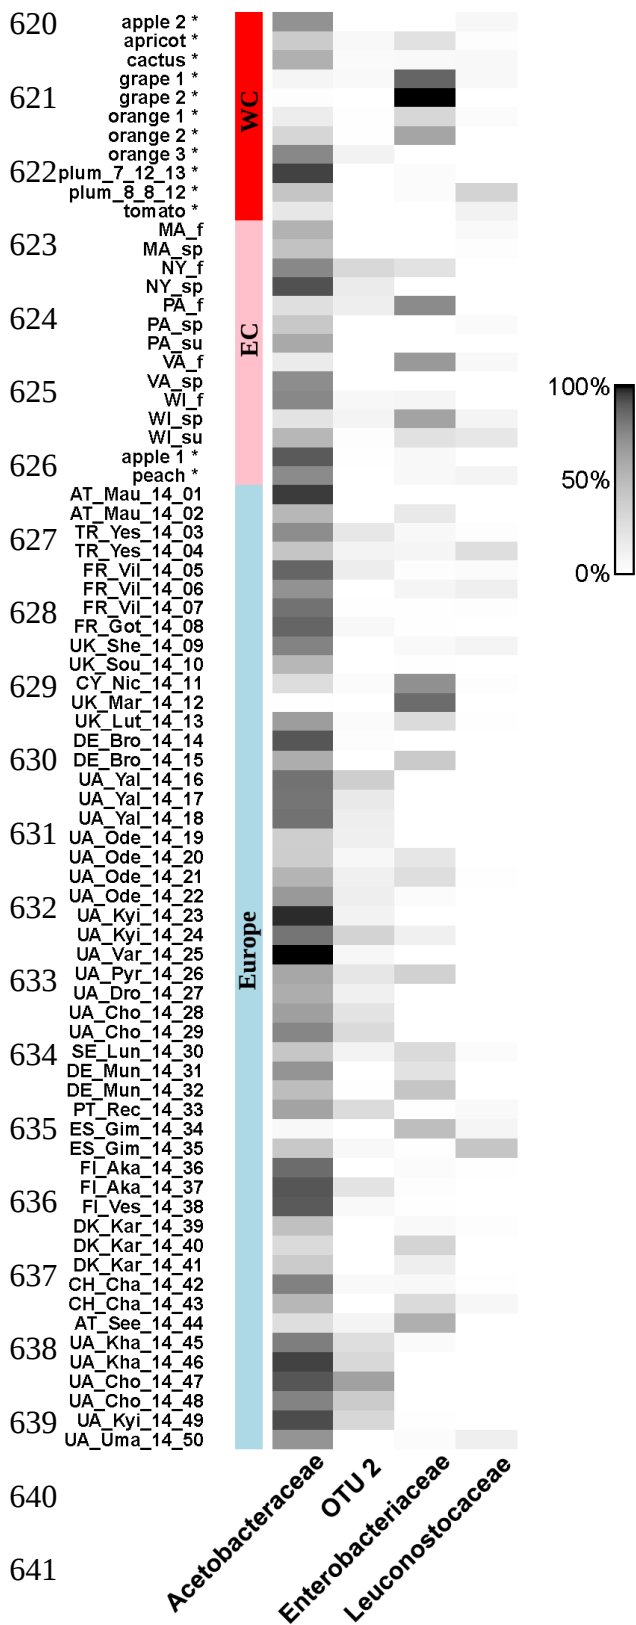

642 **Figure 4** The bacteria that were structured  
 643 according to host genetic variation, are common in Europe, the East Coast (EC), and the  
 644 West Coast (WC) of and North America. Gray scale indicates relative abundance.  
 645 Samples marked with \* were described in Wang & Staubach (2018).

646

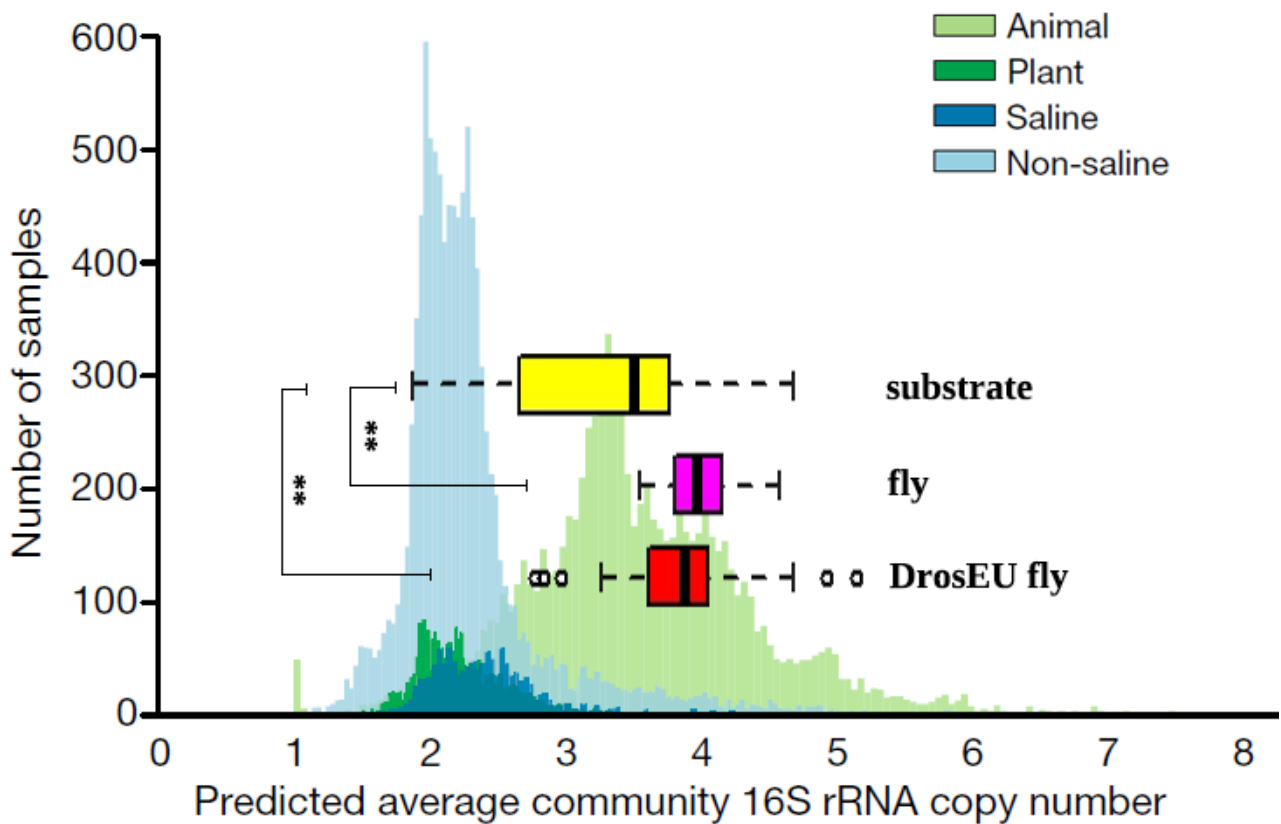

648 **Figure 5** Comparison of 16S rRNA gene average copy number (ACN) between flies and  
649 substrates. ACN was higher in the fly than in the substrate communities (\*\* $P < 0.01$ , Mann-  
650 Whitney-U test, one-sided). Barplot (blue and green) in the background shows ACN from  
651 (Thompson et al. 2017). Fly as well as substrate samples were in the typical range of  
652 animal-associated microbiomes.

653

654

655

656

657

658

659

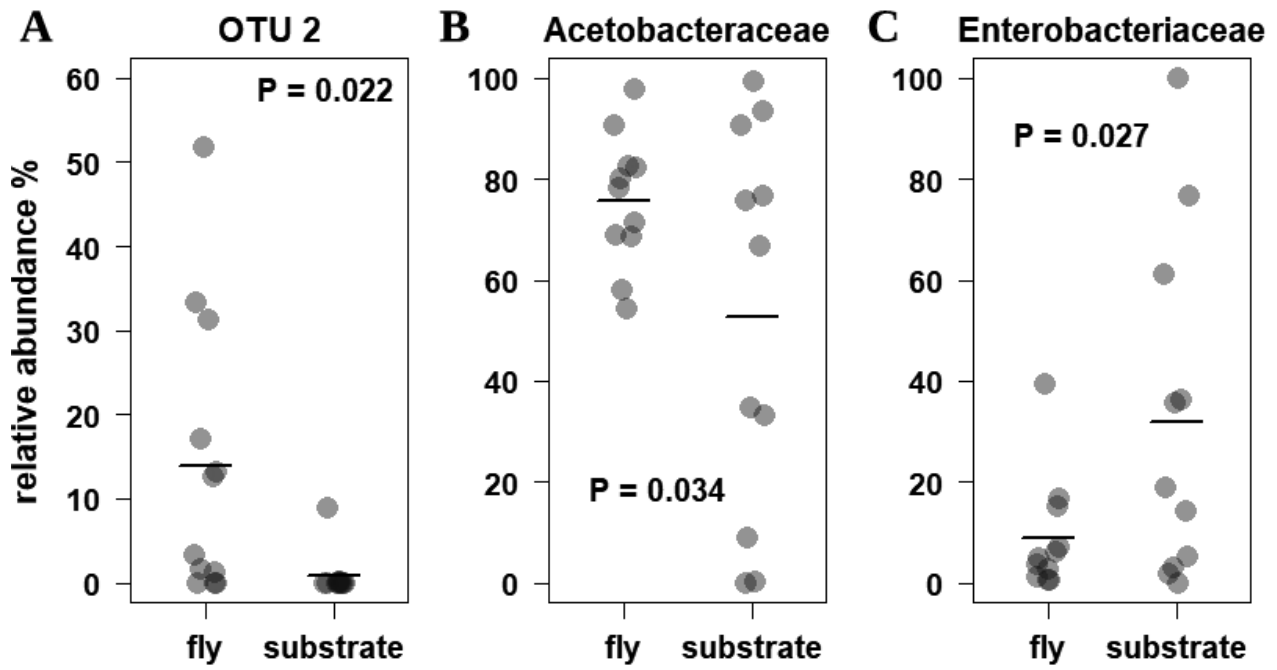

660 **Figure 6** Comparison of relative abundance of (A) OTU2, (B) Acetobacteraceae and (C)  
661 Enterobacteraceae between flies and their substrate. P-values according to paired Mann-  
662 Whitney-U test, one-sided.

663

664

665

666

667

668

669

670

671

672

673

674

## References

- Adair KL, Wilson M, Bost A, Douglas AE. 2018. Microbial community assembly in wild populations of the fruit fly *Drosophila melanogaster*. *The ISME Journal* **12**:959–972. doi:10.1038/s41396-017-0020-x
- Agler MT, Ruhe J, Kroll S, Morhenn C, Kim S-T, Weigel D, Kemen EM. 2016. Microbial Hub Taxa Link Host and Abiotic Factors to Plant Microbiome Variation. *PLOS Biology* **14**:e1002352. doi:10.1371/journal.pbio.1002352
- Ankrah NYD, Douglas AE. 2018. Nutrient factories: metabolic function of beneficial microorganisms associated with insects. *Environmental Microbiology* **20**:2002–2011. doi:10.1111/1462-2920.14097
- Bang C, Dagan T, Deines P, Dubilier N, Duschl WJ, Fraune S, Hentschel U, Hirt H, Hülter N, Lachnit T, Picazo D, Pita L, Pogoreutz C, Rädicker N, Saad MM, Schmitz RA, Schulenburg H, Voolstra CR, Weiland-Bräuer N, Ziegler M, Bosch TCG. 2018. Metaorganisms in extreme environments: do microbes play a role in organismal adaptation? *Zoology* **127**:1–19. doi:10.1016/j.zool.2018.02.004
- Barata A, Santos SC, Malfeito-Ferreira M, Loureiro V. 2012. New Insights into the Ecological Interaction Between Grape Berry Microorganisms and *Drosophila* Flies During the Development of Sour Rot. *Microb Ecol* **64**:416–430. doi:10.1007/s00248-012-0041-y
- Basset A, Khush RS, Braun A, Gardan L, Boccard F, Hoffmann JA, Lemaitre B. 2000. The phytopathogenic bacteria *Erwinia carotovora* infects *Drosophila* and activates an immune response. *PNAS* **97**:3376–3381. doi:10.1073/pnas.97.7.3376
- Behrman EL, Howick VM, Kapun M, Staubach F, Bergland AO, Petrov DA, Lazzaro BP, Schmidt PS. 2018. Rapid seasonal evolution in innate immunity of wild *Drosophila melanogaster*. *Proceedings of the Royal Society B: Biological Sciences* **285**:20172599. doi:10.1098/rspb.2017.2599
- Bergland AO, Behrman EL, O'Brien KR, Schmidt PS, Petrov DA. 2014. Genomic Evidence of

Rapid and Stable Adaptive Oscillations over Seasonal Time Scales in *Drosophila*. *PLOS Genetics* **10**:e1004775. doi:10.1371/journal.pgen.1004775

Blum JE, Fischer CN, Miles J, Handelsman J. 2013. Frequent Replenishment Sustains the Beneficial Microbiome of *Drosophila melanogaster*. *mBio* **4**:e00860-13. doi:10.1128/mBio.00860-13

Borcard D, Gillet F, Legendre P. 2018. Numerical Ecology with R, 2nd ed, Use R! Springer International Publishing.

Bosco-Drayon V, Poidevin M, Boneca IG, Narbonne-Reveau K, Royet J, Charroux B. 2012. Peptidoglycan Sensing by the Receptor PGRP-LE in the *Drosophila* Gut Induces Immune Responses to Infectious Bacteria and Tolerance to Microbiota. *Cell Host & Microbe* **12**:153–165. doi:10.1016/j.chom.2012.06.002

Brankatschk M, Gutmann T, Knittelfelder O, Palladini A, Prince E, Grzybek M, Brankatschk B, Shevchenko A, Coskun Ü, Eaton S. 2018. A Temperature-Dependent Switch in Feeding Preference Improves *Drosophila* Development and Survival in the Cold. *Developmental Cell* **46**:781-793.e4. doi:10.1016/j.devcel.2018.05.028

Broderick NA, Buchon N, Lemaitre B. 2014. Microbiota-Induced Changes in *Drosophila melanogaster* Host Gene Expression and Gut Morphology. *mBio* **5**:e01117-14. doi:10.1128/mBio.01117-14

Caporaso JG, Lauber CL, Walters WA, Berg-Lyons D, Lozupone CA, Turnbaugh PJ, Fierer N, Knight R. 2011. Global patterns of 16S rRNA diversity at a depth of millions of sequences per sample. *PNAS* **108**:4516–4522. doi:10.1073/pnas.1000080107

Chandler JA, Lang JM, Bhatnagar S, Eisen JA, Kopp A. 2011. Bacterial Communities of Diverse *Drosophila* Species: Ecological Context of a Host–Microbe Model System. *PLOS Genetics* **7**:e1002272. doi:10.1371/journal.pgen.1002272

Chaston JM, Dobson AJ, Newell PD, Douglas AE. 2016. Host Genetic Control of the Microbiota Mediates the *Drosophila* Nutritional Phenotype. *Appl Environ Microbiol* **82**:671–679.

doi:10.1128/AEM.03301-15

Corby-Harris V, Pontaroli AC, Shimkets LJ, Bennetzen JL, Habel KE, Promislow DEL. 2007.

Geographical Distribution and Diversity of Bacteria Associated with Natural Populations of *Drosophila melanogaster*. *Appl Environ Microbiol* **73**:3470–3479. doi:10.1128/AEM.02120-06

Corby-Harris V, Promislow DEL. 2008. Host ecology shapes geographical variation for resistance to bacterial infection in *Drosophila melanogaster*. *Journal of Animal Ecology* **77**:768–776.

doi:10.1111/j.1365-2656.2008.01399.x

Cox CR, Gilmore MS. 2007. Native Microbial Colonization of *Drosophila melanogaster* and Its

Use as a Model of *Enterococcus faecalis* Pathogenesis. *Infection and Immunity* **75**:1565–1576. doi:10.1128/IAI.01496-06

Douglas AE. 2018. Which experimental systems should we use for human microbiome science?

*PLOS Biology* **16**:e2005245. doi:10.1371/journal.pbio.2005245

Dray S, Bauman D, Blanchet G, Borcard D, Clappe S, Guenard G, Jombart T, Larocque G,

Legendre P, Madi N, Wagner HH. 2018. adespatial: Multivariate Multiscale Spatial Analysis.

Ebert D. 2013a. The Epidemiology and Evolution of Symbionts with Mixed-Mode Transmission.

*Annu Rev Ecol Evol Syst* **44**:623–643. doi:10.1146/annurev-ecolsys-032513-100555

Ebert D. 2013b. The Epidemiology and Evolution of Symbionts with Mixed-Mode Transmission.

*Annu Rev Ecol Evol Syst* **44**:623–643. doi:10.1146/annurev-ecolsys-032513-100555

Efron B. 2007. Size, power and false discovery rates. *Ann Statist* **35**:1351–1377.

doi:10.1214/009053606000001460

Erkosar B, Storelli G, Defaye A, Leulier F. 2013. Host-Intestinal Microbiota Mutualism: “Learning on the Fly.” *Cell Host & Microbe* **13**:8–14. doi:10.1016/j.chom.2012.12.004

Erkosar B, Yashiro E, Zajitschek F, Friberg U, Maklakov AA, Meer JR van der, Kawecki TJ. 2018.

Host diet mediates a negative relationship between abundance and diversity of *Drosophila*



- gut microbiota. *Ecology and Evolution* **8**:9491–9502. doi:10.1002/ece3.4444
- Fick SE, Hijmans RJ. 2017. WorldClim 2: new 1-km spatial resolution climate surfaces for global land areas. *International Journal of Climatology* **37**:4302–4315. doi:10.1002/joc.5086
- Fink C, Staubach F, Kuenzel S, Baines JF, Roeder T. 2013. Noninvasive Analysis of Microbiome Dynamics in the Fruit Fly *Drosophila melanogaster*. *Appl Environ Microbiol* **79**:6984–6988. doi:10.1128/AEM.01903-13
- Flyg C, Kenne K, Boman HG. 1980. Insect pathogenic properties of *Serratia marcescens*: phage-resistant mutants with a decreased resistance to *Cecropia* immunity and a decreased virulence to *Drosophila*. *J Gen Microbiol* **120**:173–181. doi:10.1099/00221287-120-1-173
- Foster KR, Schluter J, Coyte KZ, Rakoff-Nahoum S. 2017. The evolution of the host microbiome as an ecosystem on a leash. *Nature* **548**:43–51. doi:10.1038/nature23292
- Foster KR, Wenseleers T. 2006. A general model for the evolution of mutualisms. *Journal of Evolutionary Biology* **19**:1283–1293. doi:10.1111/j.1420-9101.2005.01073.x
- Galac MR, Lazzaro BP. 2011. Comparative pathology of bacteria in the genus *Providencia* to a natural host, *Drosophila melanogaster*. *Microbes and Infection* **13**:673–683. doi:10.1016/j.micinf.2011.02.005
- Guo L, Karpac J, Tran SL, Jasper H. 2014. PGRP-SC2 Promotes Gut Immune Homeostasis to Limit Commensal Dysbiosis and Extend Lifespan. *Cell* **156**:109–122. doi:10.1016/j.cell.2013.12.018
- Ha E-M, Oh C-T, Bae YS, Lee W-J. 2005. A Direct Role for Dual Oxidase in *Drosophila* Gut Immunity. *Science* **310**:847–850. doi:10.1126/science.1117311
- Hubbell SP. 2001. *The Unified Neutral Theory of Biodiversity and Biogeography*. Princeton University Press.
- Iatsenko I, Kondo S, Mengin-Lecreulx D, Lemaitre B. 2016. PGRP-SD, an Extracellular Pattern-Recognition Receptor, Enhances Peptidoglycan-Mediated Activation of the *Drosophila* Imd Pathway. *Immunity* **45**:1013–1023. doi:10.1016/j.immuni.2016.10.029

- Jaenike J, Unckless R, Cockburn SN, Boelio LM, Perlman SJ. 2010. Adaptation via Symbiosis: Recent Spread of a *Drosophila* Defensive Symbiont. *Science* **329**:212–215.  
doi:10.1126/science.1188235
- Kahle D, Wickham H. 2013. ggmap: Spatial Visualization with ggplot2. *The R Journal* **5**:144–161.
- Kapun M, Aduriz MGB, Staubach F, Vieira J, Obbard D, Goubert C, Stabelli OR, Kankare M, Haudry A, Wiberg RAW, Waidele L, Kozeretska I, Pasyukova E, Loeschcke V, Pascual M, Vieira CP, Serga S, Montchamp-Moreau C, Abbott J, Gibert P, Porcelli D, Posnien N, Grath S, Sucena E, Bergland A, Guerreiro MPG, Onder BS, Argyridou E, Guio L, Schou MF, Deplancke B, Vieira C, Ritchie MG, Zwaan B, Tauber E, Orengo D, Puerma E, Aguade M, Schmidt P, Parsch J, Betancourt A, Flatt T, Gonzalez J. 2018. Genomic analysis of European *Drosophila* populations reveals longitudinal structure and continent-wide selection. *bioRxiv* 313759. doi:10.1101/313759
- Kozich JJ, Westcott SL, Baxter NT, Highlander SK, Schloss PD. 2013. Development of a Dual-Index Sequencing Strategy and Curation Pipeline for Analyzing Amplicon Sequence Data on the MiSeq Illumina Sequencing Platform. *Appl Environ Microbiol* **79**:5112–5120.  
doi:10.1128/AEM.01043-13
- Langille MGI, Zaneveld J, Caporaso JG, McDonald D, Knights D, Reyes JA, Clemente JC, Burkepille DE, Vega Thurber RL, Knight R, Beiko RG, Huttenhower C. 2013. Predictive functional profiling of microbial communities using 16S rRNA marker gene sequences. *Nature Biotechnology* **31**:814–821. doi:10.1038/nbt.2676
- Lawrie DS, Messer PW, Hershberg R, Petrov DA. 2013. Strong Purifying Selection at Synonymous Sites in *D. melanogaster*. *PLOS Genetics* **9**:e1003527. doi:10.1371/journal.pgen.1003527
- Lazzaro BP, Flores HA, Lorigan JG, Yourth CP. 2008. Genotype-by-Environment Interactions and Adaptation to Local Temperature Affect Immunity and Fecundity in *Drosophila melanogaster*. *PLOS Pathogens* **4**:e1000025. doi:10.1371/journal.ppat.1000025
- Lazzaro BP, Sackton TB, Clark AG. 2006. Genetic Variation in *Drosophila melanogaster*

Resistance to Infection: A Comparison Across Bacteria. *Genetics* **174**:1539–1554.

doi:10.1534/genetics.105.054593

Lee K-A, Kim S-H, Kim E-K, Ha E-M, You H, Kim B, Kim M-J, Kwon Y, Ryu J-H, Lee W-J.

2013. Bacterial-Derived Uracil as a Modulator of Mucosal Immunity and Gut-Microbe Homeostasis in *Drosophila*. *Cell* **153**:797–811. doi:10.1016/j.cell.2013.04.009

Ley RE, Hamady M, Lozupone C, Turnbaugh PJ, Ramey RR, Bircher JS, Schlegel ML, Tucker TA,

Schrenzel MD, Knight R, Gordon JI. 2008. Evolution of Mammals and Their Gut Microbes. *Science* **320**:1647–1651. doi:10.1126/science.1155725

Lhocine N, Ribeiro PS, Buchon N, Wepf A, Wilson R, Tenev T, Lemaitre B, Gstaiger M, Meier P,

Leulier F. 2008. PIMS Modulates Immune Tolerance by Negatively Regulating *Drosophila* Innate Immune Signaling. *Cell Host & Microbe* **4**:147–158.

doi:10.1016/j.chom.2008.07.004

Linnenbrink M, Wang J, Hardouin EA, Künzel S, Metzler D, Baines JF. 2013. The role of

biogeography in shaping diversity of the intestinal microbiota in house mice. *Molecular Ecology* **22**:1904–1916. doi:10.1111/mec.12206

Machado H, Bergland AO, Taylor R, Tilk S, Behrman E, Dyer K, Fabian D, Flatt T, Gonzalez J,

Karasov T, Kozeretska I, Lazzaro B, Merritt T, Pool J, O'Brien K, Rajpurohit S, Roy P, Schaeffer S, Serga S, Schmidt P, Petrov D. 2018. Broad geographic sampling reveals predictable and pervasive seasonal adaptation in *Drosophila*. *bioRxiv* 337543.

doi:10.1101/337543

Martino ME, Joncour P, Leenay R, Gervais H, Shah M, Hughes S, Gillet B, Beisel C, Leulier F.

2018. Bacterial Adaptation to the Host's Diet Is a Key Evolutionary Force Shaping *Drosophila*-*Lactobacillus* Symbiosis. *Cell Host & Microbe* **24**:109-119.e6.

doi:10.1016/j.chom.2018.06.001

Matzinger P. 2002. The Danger Model: A Renewed Sense of Self. *Science* **296**:301–305.

doi:10.1126/science.1071059

- Neyen C, Runchel C, Schüpfer F, Meier P, Lemaitre B. 2016. The regulatory isoform rPGRP-LC induces immune resolution via endosomal degradation of receptors. *Nature Immunology* **17**:1150–1158. doi:10.1038/ni.3536
- Obadia B, Güvener ZT, Zhang V, Ceja-Navarro JA, Brodie EL, Ja WW, Ludington WB. 2017. Probabilistic Invasion Underlies Natural Gut Microbiome Stability. *Current Biology* **27**:1999-2006.e8. doi:10.1016/j.cub.2017.05.034
- Oksanen J, Blanchet FG, Friendly M, Kindt R, Legendre P, McGlinn D, Minchin PR, O’Hara RB, Simpson GL, Solymos P, Stevens MHH, Szoecs E, Wagner H. 2018. vegan: Community Ecology Package.
- Pais IS, Valente RS, Sporniak M, Teixeira L. 2018. *Drosophila melanogaster* establishes a species-specific mutualistic interaction with stable gut-colonizing bacteria. *PLOS Biology* **16**:e2005710. doi:10.1371/journal.pbio.2005710
- Parsch J, Novozhilov S, Saminadin-Peter SS, Wong KM, Andolfatto P. 2010. On the Utility of Short Intron Sequences as a Reference for the Detection of Positive and Negative Selection in *Drosophila*. *Mol Biol Evol* **27**:1226–1234. doi:10.1093/molbev/msq046
- Pruesse E, Quast C, Knittel K, Fuchs BM, Ludwig W, Peplies J, Glöckner FO. 2007. SILVA: a comprehensive online resource for quality checked and aligned ribosomal RNA sequence data compatible with ARB. *Nucleic Acids Res* **35**:7188–7196. doi:10.1093/nar/gkm864
- Queller DC, Strassmann JE. 2018. Evolutionary Conflict. *Annual Review of Ecology, Evolution, and Systematics*. doi:10.1146/annurev-ecolsys-110617-062527
- Roh SW, Nam Y-D, Chang H-W, Kim K-H, Kim M-S, Ryu J-H, Kim S-H, Lee W-J, Bae J-W. 2008. Phylogenetic Characterization of Two Novel Commensal Bacteria Involved with Innate Immune Homeostasis in *Drosophila melanogaster*. *Appl Environ Microbiol* **74**:6171–6177. doi:10.1128/AEM.00301-08
- Rothschild D, Weissbrod O, Barkan E, Kurilshikov A, Korem T, Zeevi D, Costea PI, Godneva A, Kalka IN, Bar N, Shilo S, Lador D, Vila AV, Zmora N, Pevsner-Fischer M, Israeli D,

- Kosower N, Malka G, Wolf BC, Avnit-Sagi T, Lotan-Pompan M, Weinberger A, Halpern Z, Carmi S, Fu J, Wijmenga C, Zhernakova A, Elinav E, Segal E. 2018. Environment dominates over host genetics in shaping human gut microbiota. *Nature* **555**:210–215. doi:10.1038/nature25973
- Ryu J-H, Kim S-H, Lee H-Y, Bai JY, Nam Y-D, Bae J-W, Lee DG, Shin SC, Ha E-M, Lee W-J. 2008. Innate Immune Homeostasis by the Homeobox Gene Caudal and Commensal-Gut Mutualism in *Drosophila*. *Science* **319**:777–782. doi:10.1126/science.1149357
- Sannino DR, Dobson AJ, Edwards K, Angert ER, Buchon N. 2018. The *Drosophila melanogaster* Gut Microbiota Provisions Thiamine to Its Host. *mBio* **9**:e00155-18. doi:10.1128/mBio.00155-18
- Schloss PD, Westcott SL, Ryabin T, Hall JR, Hartmann M, Hollister EB, Lesniewski RA, Oakley BB, Parks DH, Robinson CJ, Sahl JW, Stres B, Thallinger GG, Horn DJV, Weber CF. 2009. Introducing mothur: Open-Source, Platform-Independent, Community-Supported Software for Describing and Comparing Microbial Communities. *Appl Environ Microbiol* **75**:7537–7541. doi:10.1128/AEM.01541-09
- Schluter J, Foster KR. 2012. The Evolution of Mutualism in Gut Microbiota Via Host Epithelial Selection. *PLOS Biology* **10**:e1001424. doi:10.1371/journal.pbio.1001424
- Shin SC, Kim S-H, You H, Kim B, Kim AC, Lee K-A, Yoon J-H, Ryu J-H, Lee W-J. 2011. *Drosophila* Microbiome Modulates Host Developmental and Metabolic Homeostasis via Insulin Signaling. *Science* **334**:670–674. doi:10.1126/science.1212782
- Sieber M, Pita L, Weiland-Bräuer N, Dirksen P, Wang J, Mortzfeld B, Franzenburg S, Schmitz RA, Baines JF, Fraune S, Hentschel U, Schulenburg H, Bosch TCG, Traulsen A. 2018. The Neutral Metaorganism. *bioRxiv* 367243. doi:10.1101/367243
- Sommer AJ, Newell PD. 2018. Metabolic Basis for Mutualism Between Gut Bacteria and Its Impact on Their Host *Drosophila melanogaster*. *Appl Environ Microbiol* **AEM.01882-18**. doi:10.1128/AEM.01882-18

- Staubach F, Baines JF, Künzel S, Bik EM, Petrov DA. 2013. Host Species and Environmental Effects on Bacterial Communities Associated with *Drosophila* in the Laboratory and in the Natural Environment. *PLOS ONE* **8**:e70749. doi:10.1371/journal.pone.0070749
- Storelli G, Defaye A, Erkosar B, Hols P, Royet J, Leulier F. 2011. Lactobacillus plantarum Promotes *Drosophila* Systemic Growth by Modulating Hormonal Signals through TOR-Dependent Nutrient Sensing. *Cell Metabolism* **14**:403–414. doi:10.1016/j.cmet.2011.07.012
- Storelli G, Strigini M, Grenier T, Bozonnet L, Schwarzer M, Daniel C, Matos R, Leulier F. 2018. *Drosophila* Perpetuates Nutritional Mutualism by Promoting the Fitness of Its Intestinal Symbiont Lactobacillus plantarum. *Cell Metabolism* **27**:362-377.e8. doi:10.1016/j.cmet.2017.11.011
- Téfit MA, Leulier F. 2017. Lactobacillus plantarum favors the early emergence of fit and fertile adult *Drosophila* upon chronic undernutrition. *Journal of Experimental Biology* **220**:900–907. doi:10.1242/jeb.151522
- The Human Microbiome Project Consortium, Huttenhower C, Gevers D, Knight R, Abubucker S, Badger JH, Chinwalla AT, Creasy HH, Earl AM, FitzGerald MG, Fulton RS, Giglio MG, Hallsworth-Pepin K, Lobos EA, Madupu R, Magrini V, Martin JC, Mitreva M, Muzny DM, Sodergren EJ, Versalovic J, Wollam AM, Worley KC, Wortman JR, Young SK, Zeng Q, Aagaard KM, Abolude OO, Allen-Vercoe E, Alm EJ, Alvarado L, Andersen GL, Anderson S, Appelbaum E, Arachchi HM, Armitage G, Arze CA, Ayvaz T, Baker CC, Begg L, Belachew T, Bhonagiri V, Bihan M, Blaser MJ, Bloom T, Bonazzi V, Paul Brooks J, Buck GA, Buhay CJ, Busam DA, Campbell JL, Canon SR, Cantarel BL, Chain PSG, Chen I-MA, Chen L, Chhibba S, Chu K, Ciulla DM, Clemente JC, Clifton SW, Conlan S, Crabtree J, Cutting MA, Davidovics NJ, Davis CC, DeSantis TZ, Deal C, Delehaunty KD, Dewhirst FE, Deych E, Ding Y, Dooling DJ, Dugan SP, Michael Dunne W, Scott Durkin A, Edgar RC, Erlich RL, Farmer CN, Farrell RM, Faust K, Feldgarden M, Felix VM, Fisher S, Fodor AA, Forney LJ, Foster L, Di Francesco V, Friedman J, Friedrich DC, Fronick CC, Fulton LL,

Gao H, Garcia N, Giannoukos G, Giblin C, Giovanni MY, Goldberg JM, Goll J, Gonzalez A, Griggs A, Gujja S, Kinder Haake S, Haas BJ, Hamilton HA, Harris EL, Hepburn TA, Herter B, Hoffmann DE, Holder ME, Howarth C, Huang KH, Huse SM, Izard J, Jansson JK, Jiang H, Jordan C, Joshi V, Katancik JA, Keitel WA, Kelley ST, Kells C, King NB, Knights D, Kong HH, Koren O, Koren S, Kota KC, Kovar CL, Kyrpides NC, La Rosa PS, Lee SL, Lemon KP, Lennon N, Lewis CM, Lewis L, Ley RE, Li K, Liolios K, Liu B, Liu Y, Lo C-C, Lozupone CA, Dwayne Lunsford R, Madden T, Mahurkar AA, Mannon PJ, Mardis ER, Markowitz VM, Mavromatis K, McCorrison JM, McDonald D, McEwen J, McGuire AL, McInnes P, Mehta T, Mihindukulasuriya KA, Miller JR, Minx PJ, Newsham I, Nusbaum C, O’Laughlin M, Orvis J, Pagani I, Palaniappan K, Patel SM, Pearson M, Peterson J, Podar M, Pohl C, Pollard KS, Pop M, Priest ME, Proctor LM, Qin X, Raes J, Ravel J, Reid JG, Rho M, Rhodes R, Riehle KP, Rivera MC, Rodriguez-Mueller B, Rogers Y-H, Ross MC, Russ C, Sanka RK, Sankar P, Fah Sathirapongsasuti J, Schloss JA, Schloss PD, Schmidt TM, Scholz M, Schriml L, Schubert AM, Segata N, Segre JA, Shannon WD, Sharp RR, Sharpton TJ, Shenoy N, Sheth NU, Simone GA, Singh I, Smillie CS, Sobel JD, Sommer DD, Spicer P, Sutton GG, Sykes SM, Tabbaa DG, Thiagarajan M, Tomlinson CM, Torralba M, Treangen TJ, Truty RM, Vishnivetskaya TA, Walker J, Wang L, Wang Z, Ward DV, Warren W, Watson MA, Wellington C, Wetterstrand KA, White JR, Wilczek-Boney K, Wu Y, Wylie KM, Wylie T, Yandava C, Ye L, Ye Y, Yooseph S, Youmans BP, Zhang L, Zhou Y, Zhu Y, Zoloth L, Zucker JD, Birren BW, Gibbs RA, Highlander SK, Methé BA, Nelson KE, Petrosino JF, Weinstock GM, Wilson RK, White O. 2012. Structure, function and diversity of the healthy human microbiome. *Nature* **486**:207–214. doi:10.1038/nature11234

Thompson LR, Sanders JG, McDonald D, Amir A, Ladau J, Locey KJ, Prill RJ, Tripathi A, Gibbons SM, Ackermann G, Navas-Molina JA, Janssen S, Kopylova E, Vázquez-Baeza Y, González A, Morton JT, Mirarab S, Zech Xu Z, Jiang L, Haroon MF, Kanbar J, Zhu Q, Jin Song S, Kosciulek T, Bokulich NA, Lefler J, Brislawn CJ, Humphrey G, Owens SM, Hampton-

Marcell J, Berg-Lyons D, McKenzie V, Fierer N, Fuhrman JA, Clauzet A, Stevens RL, Shade A, Pollard KS, Goodwin KD, Jansson JK, Gilbert JA, Knight R, The Earth Microbiome Project Consortium, Rivera JLA, Al-Moosawi L, Alverdy J, Amato KR, Andras J, Angenent LT, Antonopoulos DA, Apprill A, Armitage D, Ballantine K, Bárta J, Baum JK, Berry A, Bhatnagar A, Bhatnagar M, Biddle JF, Bittner L, Boldgiv B, Bottos E, Boyer DM, Braun J, Brazelton W, Brearley FQ, Campbell AH, Caporaso JG, Cardona C, Carroll J, Cary SC, Casper BB, Charles TC, Chu H, Claar DC, Clark RG, Clayton JB, Clemente JC, Cochran A, Coleman ML, Collins G, Colwell RR, Contreras M, Crary BB, Creer S, Cristol DA, Crump BC, Cui D, Daly SE, Davalos L, Dawson RD, Defazio J, Delsuc F, Dionisi HM, Dominguez-Bello MG, Dowell R, Dubinsky EA, Dunn PO, Ercolini D, Espinoza RE, Ezenwa V, Fenner N, Findlay HS, Fleming ID, Fogliano V, Forsman A, Freeman C, Friedman ES, Galindo G, Garcia L, Garcia-Amado MA, Garshelis D, Gasser RB, Gerdts G, Gibson MK, Gifford I, Gill RT, Giray T, Gittel A, Golyshin P, Gong D, Grossart H-P, Guyton K, Haig S-J, Hale V, Hall RS, Hallam SJ, Handley KM, Hasan NA, Haydon SR, Hickman JE, Hidalgo G, Hofmockel KS, Hooker J, Hulth S, Hultman J, Hyde E, Ibáñez-Álamo JD, Jastrow JD, Jex AR, Johnson LS, Johnston ER, Joseph S, Jurburg SD, Jurelevicius D, Karlsson A, Karlsson R, Kauppinen S, Kellogg CTE, Kennedy SJ, Kerkhof LJ, King GM, Kling GW, Koehler AV, Krezalek M, Kueneman J, Lamendella R, Landon EM, Lane-deGraaf K, LaRoche J, Larsen P, Laverock B, Lax S, Lentino M, Levin II, Liancourt P, Liang W, Linz AM, Lipson DA, Liu Y, Lladser ME, Lozada M, Spirito CM, MacCormack WP, MacRae-Crerar A, Magris M, Martín-Platero AM, Martín-Vivaldi M, Martínez LM, Martínez-Bueno M, Marzinelli EM, Mason OU, Mayer GD, McDevitt-Irwin JM, McDonald JE, McGuire KL, McMahan KD, McMinds R, Medina M, Mendelson JR, Metcalf JL, Meyer F, Michelangeli F, Miller K, Mills DA, Minich J, Mocali S, Moitinho-Silva L, Moore A, Morgan-Kiss RM, Munroe P, Myrold D, Neufeld JD, Ni Y, Nicol GW, Nielsen S, Nissimov JI, Niu K, Nolan MJ, Noyce K, O'Brien SL, Okamoto N, Orlando L,



Castellano YO, Osuolale O, Oswald W, Parnell J, Peralta-Sánchez JM, Petraitis P, Pfister C, Pilon-Smits E, Piombino P, Pointing SB, Pollock FJ, Potter C, Prithiviraj B, Quince C, Rani A, Ranjan R, Rao S, Rees AP, Richardson M, Riebesell U, Robinson C, Rockne KJ, Rodriguezl SM, Rohwer F, Roundstone W, Safran RJ, Sangwan N, Sanz V, Schrenk M, Schrenzel MD, Scott NM, Seger RL, Seguin-Orlando A, Seldin L, Seyler LM, Shakhsheer B, Sheets GM, Shen C, Shi Y, Shin H, Shogan BD, Shutler D, Siegel J, Simmons S, Sjöling S, Smith DP, Soler JJ, Sperling M, Steinberg PD, Stephens B, Stevens MA, Taghavi S, Tai V, Tait K, Tan CL, Tas, N, Taylor DL, Thomas T, Timling I, Turner BL, Urich T, Ursell LK, van der Lelie D, Van Treuren W, van Zwieten L, Vargas-Robles D, Thurber RV, Vitaglione P, Walker DA, Walters WA, Wang S, Wang T, Weaver T, Webster NS, Wehrle B, Weisenhorn P, Weiss S, Werner JJ, West K, Whitehead A, Whitehead SR, Whittingham LA, Willerslev E, Williams AE, Wood SA, Woodhams DC, Yang Y, Zaneveld J, Zarraindia I, Zhang Q, Zhao H. 2017. A communal catalogue reveals Earth's multiscale microbial diversity. *Nature* **551**:457–463. doi:10.1038/nature24621

Unckless RL, Rottschaefer SM, Lazzaro BP. 2015. The Complex Contributions of Genetics and Nutrition to Immunity in *Drosophila melanogaster*. *PLOS Genetics* **11**:e1005030. doi:10.1371/journal.pgen.1005030

Vodovar N, Vinals M, Liehl P, Basset A, Degrouard J, Spellman P, Boccard F, Lemaitre B. 2005. *Drosophila* host defense after oral infection by an entomopathogenic *Pseudomonas* species. *PNAS* **102**:11414–11419. doi:10.1073/pnas.0502240102

Waidele L, Korb J, Voolstra CR, Künzel S, Dedeine F, Staubach F. 2017. Differential Ecological Specificity of Protist and Bacterial Microbiomes across a Set of Termite Species. *Front Microbiol* **8**. doi:10.3389/fmicb.2017.02518

Wallace JR. 2012. Imap: Interactive Mapping.

Walters AW, Matthews MK, Hughes RC, Malcolm J, Rudman S, Newell PD, Douglas AE, Schmidt PS, Chaston J. 2018. The microbiota influences the *Drosophila melanogaster* life history

strategy. *bioRxiv* 471540. doi:10.1101/471540

Wang J, Linnenbrink M, Künzel S, Fernandes R, Nadeau M-J, Rosenstiel P, Baines JF. 2014.

Dietary history contributes to enterotype-like clustering and functional metagenomic content in the intestinal microbiome of wild mice. *PNAS* **111**:E2703–E2710.

doi:10.1073/pnas.1402342111

Wang Y, Staubach F. 2018. Individual variation of natural *D. melanogaster*-associated bacterial communities. *FEMS Microbiol Lett* **365**. doi:10.1093/femsle/fny017

Wong AC-N, Chaston JM, Douglas AE. 2013. The inconstant gut microbiota of *Drosophila* species revealed by 16S rRNA gene analysis. *The ISME Journal* **7**:1922–1932.

doi:10.1038/ismej.2013.86

Wong AC-N, Luo Y, Jing X, Franzenburg S, Bost A, Douglas AE. 2015. The Host as the Driver of the Microbiota in the Gut and External Environment of *Drosophila melanogaster*. *Appl Environ Microbiol* **81**:6232–6240. doi:10.1128/AEM.01442-15

Wu GD, Chen J, Hoffmann C, Bittinger K, Chen Y-Y, Keilbaugh SA, Bewtra M, Knights D, Walters WA, Knight R, Sinha R, Gilroy E, Gupta K, Baldassano R, Nessel L, Li H, Bushman FD, Lewis JD. 2011. Linking Long-Term Dietary Patterns with Gut Microbial Enterotypes. *Science* **334**:105–108. doi:10.1126/science.1208344

Zhou J, Deng Y, Shen L, Wen C, Yan Q, Ning D, Qin Y, Xue K, Wu L, He Z, Voordeckers JW, Nostrand JDV, Buzzard V, Michaletz ST, Enquist BJ, Weiser MD, Kaspari M, Waide R, Yang Y, Brown JH. 2016. Temperature mediates continental-scale diversity of microbes in forest soils. *Nature Communications* **7**:12083. doi:10.1038/ncomms12083
